# Supplementary material
Source: publisher site journal article supplement (https://www.spandidos-publications.com/1751/downloadSupplementary)
Supplement: Supplementary file 1 [file downloadSupplementary]

Figure S1. The expression of *SCGB2A1* mRNA in cancer cell lines from the Broad Institute Cancer Cell Line Encyclopedia database. The x axis represents different cancer cell lines, and the y axis represents *SCGB2A1* mRNA expression values. *SCGB2A1*, secretoglobin family 2A member 1.

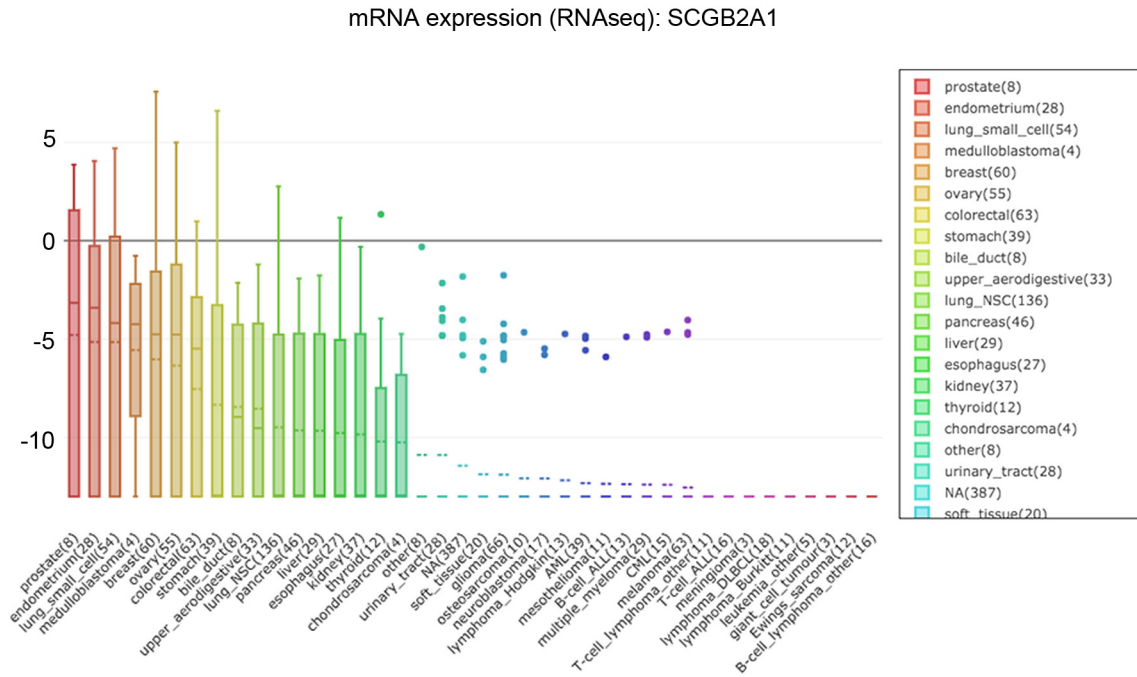

Figure S2. *SCGB2A1* expression in two patients with endometrial cancer detected by immunohistochemistry from the The Human Protein Atlas database. The expression of *SCGB2A1* in endometrial cancer was strong positive in brown color. *SCGB2A1*, secretoglobulin family 2A member 1.

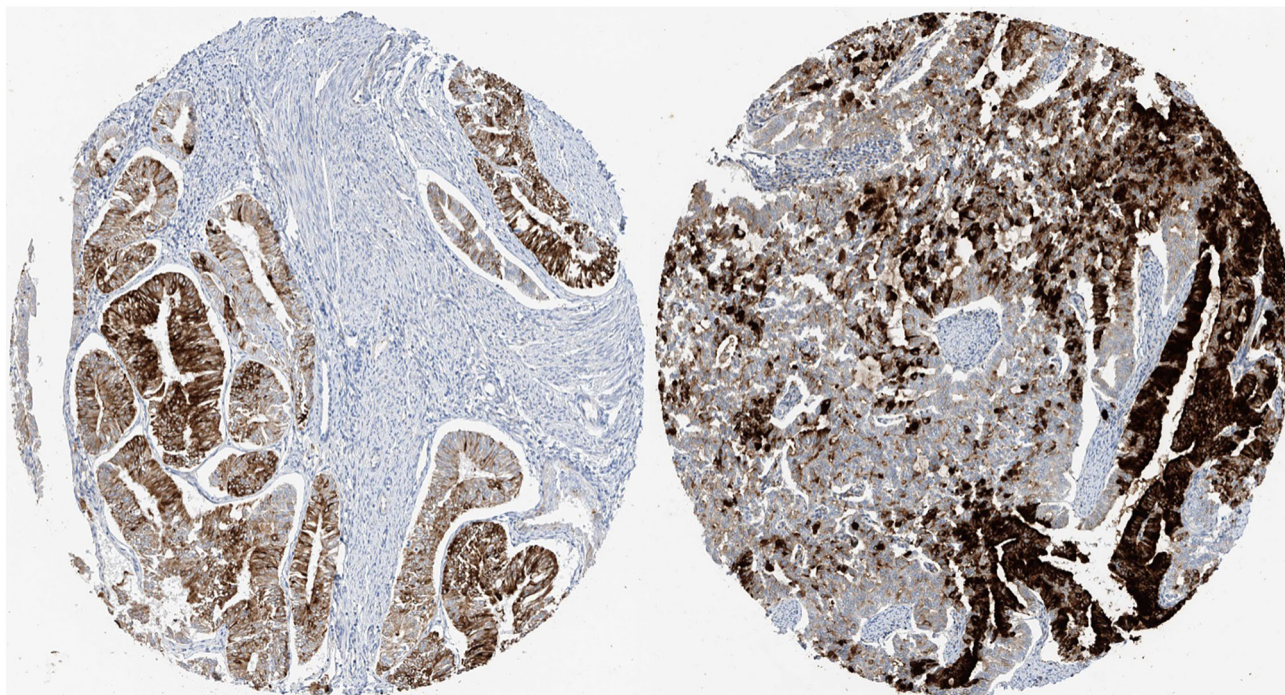

Figure S3. DNA methylation analysis of *SCGB2A1* in UCEC using the Mexpress tool. The solid lines represent six *SCGB2A1* methylation sites and r-value represents the correlation between *SCGB2A1* DNA methylation and *SCGB2A1* gene expression regulation. Probe 1 =cg01919620,  $r=-0.017$ ,  $P>0.05$ ; probe 2 =cg05277881,  $r=-0.339$ ,  $P<0.001$ ; probe 3 =cg16986846,  $r=-0.210$ ,  $P<0.001$ ; probe 4 =cg06334737,  $r=-0.295$ ,  $P<0.001$ ; probe 5=cg23206745,  $r=-0.378$ ,  $P<0.001$  and probe 6=cg14265033,  $r=-0.198$ ,  $P<0.001$ . *SCGB2A1*, secretoglobin family 2A member 1.

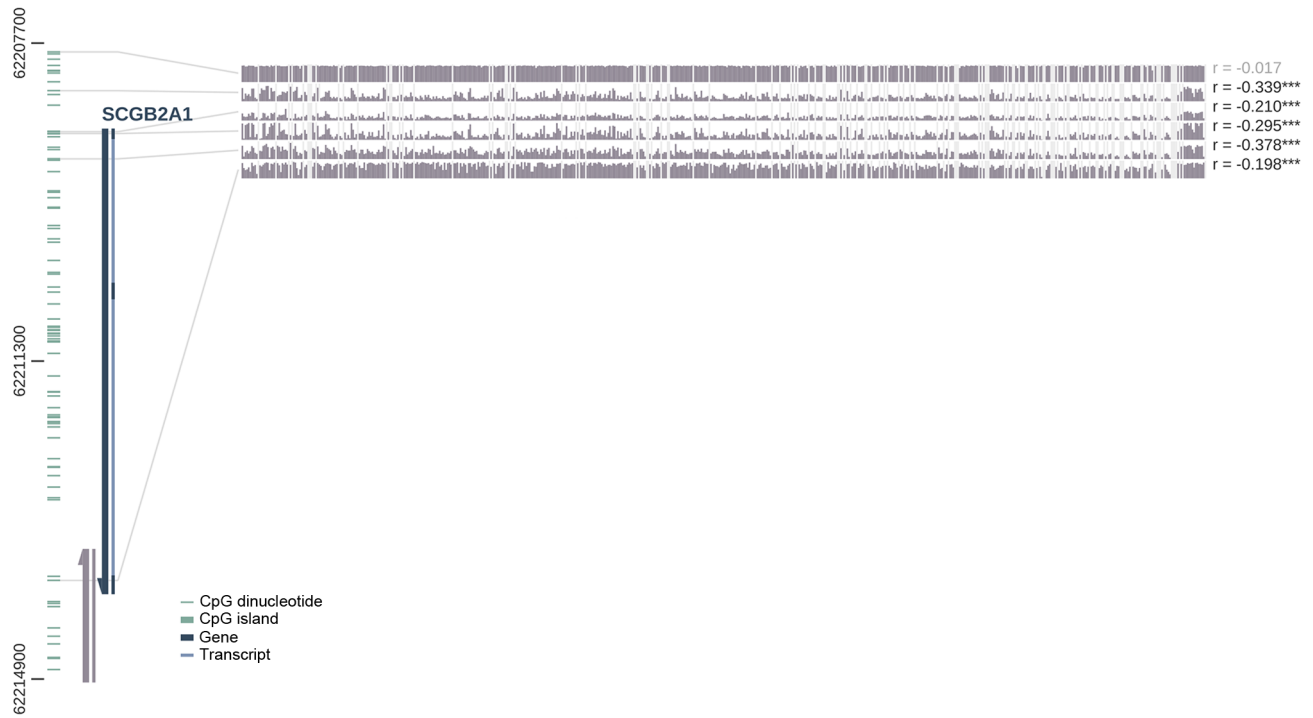

Table SI. Clinical characteristics of 47 patients with endometrial cancer from the Fudan University Shanghai Cancer Center.

| Clinical characteristics                | Number (%)  |
|-----------------------------------------|-------------|
| Age at diagnosis <sup>a</sup> , years   | 52 (42-69)  |
| Race                                    |             |
| White                                   | 0 (0)       |
| Black or African American               | 0 (0)       |
| Other                                   | 47 (100)    |
| Menopause status                        |             |
| Pre                                     | 12 (25.53)  |
| Post                                    | 35 (74.47)  |
| Surgical approach                       |             |
| Minimally invasive                      |             |
| Open                                    | 47 (100)    |
| Histological type                       |             |
| Serous endometrial adenocarcinoma       | 8 (17.02)   |
| Endometrioid endometrial adenocarcinoma | 39 (82.98)  |
| Mixed serous and endometrioid           | 0 (0)       |
| Grade                                   |             |
| Low G1                                  | 38 (80.85)  |
| Moderate G2                             | 9 (19.15)   |
| High G3                                 | 0 (0)       |
| Tumor invasion depth, %                 |             |
| <50%                                    | 43 (91.49%) |
| ≥50%                                    | 4 (8.51%)   |
| Tumor status                            |             |
| Tumor free                              | 2 (4.26)    |
| With tumor                              | 45 (95.74)  |
| Residual tumor                          |             |
| No residual R0                          | 47 (100)    |
| With residual R1/R2                     | 0 (0)       |
| Peritoneal washing                      |             |
| Negative                                | 47 (100)    |
| Positive                                | 0 (0)       |
| Pelvic lymph node metastasis            |             |
| Negative                                | 43 (91.49)  |
| Positive                                | 4 (8.51)    |
| Para-aortic lymph node                  |             |
| Negative                                | 47 (100)    |
| Positive                                | 0 (0)       |
| Stage                                   |             |
| I                                       | 39 (82.98)  |
| II                                      | 4 (8.51)    |
| III                                     | 4 (8.51)    |
| IV                                      | 0 (0)       |

<sup>a</sup>Presented as median (range).
